# Supplementary material for: Clinicopathologic Characteristics of Pregnancy-Associated Breast Cancer: Results of Analysis of a Nationwide Breast Cancer Registry Database
Source: PubMed Central journal article supplement — J Breast Cancer. 2017 Sep 22;20(3):264–9. doi: 10.4048/jbc.2017.20.3.264 (PMC5620441; doi:10.4048/jbc.2017.20.3.264), 2017-09-22
Supplement: jbc-20-264-s001.pdf [file jbc-20-264-s001.pdf]

**Supplementary Table 1.** Clinicopathologic characteristics of matching patients and non-matching patients in non-PABC

| Characteristic                 | Non-PABC matching patients (n=668) No. (%) | Non-PABC non-matching patients (n=40,528) No. (%) | p-value | Characteristic   | Non-PABC matching patients (n=668) No. (%) | Non-PABC non-matching patients (n=40,528) No. (%) | p-value |
|--------------------------------|--------------------------------------------|---------------------------------------------------|---------|------------------|--------------------------------------------|---------------------------------------------------|---------|
| Age (yr)*                      | 34.2±4.4                                   | 39.5±4.7                                          | <0.001  | Histologic grade |                                            |                                                   | <0.001  |
| Breast operation               |                                            |                                                   | <0.001  | 1                | 55 (8.2)                                   | 4,539 (11.2)                                      |         |
| BCS                            | 301 (45.1)                                 | 20,673 (51.0)                                     |         | 2                | 221 (33.1)                                 | 13,535 (33.4)                                     |         |
| Total mastectomy               | 357 (53.4)                                 | 19,383 (47.8)                                     |         | 3                | 249 (37.3)                                 | 10,920 (26.9)                                     |         |
| Biopsy only                    | 8 (1.2)                                    | 174 (0.4)                                         |         | Unknown          | 143 (21.4)                                 | 11,530 (28.5)                                     |         |
| Unknown                        | 2 (0.3)                                    | 298 (0.7)                                         |         | Nuclear grade    |                                            |                                                   | <0.001  |
| Axillary operation             |                                            |                                                   | <0.001  | 1                | 45 (6.7)                                   | 3,381 (8.3)                                       |         |
| Sentinel lymph node biopsy     | 72 (10.8)                                  | 9,687 (23.9)                                      |         | 2                | 193 (28.9)                                 | 13,636 (33.6)                                     |         |
| Axillary lymph node dissection | 566 (84.7)                                 | 28,623 (70.6)                                     |         | 3                | 215 (32.2)                                 | 10,338 (25.5)                                     |         |
| No operation                   | 30 (4.5)                                   | 1,941 (4.8)                                       |         | Unknown          | 215 (32.2)                                 | 13,173 (32.5)                                     |         |
| Unknown                        | 0                                          | 277 (0.7)                                         |         | Hormone receptor |                                            |                                                   | <0.001  |
| T stage                        |                                            |                                                   | <0.001  | Positive         | 358 (53.6)                                 | 25,858 (63.8)                                     |         |
| T0                             | 18 (2.7)                                   | 4,469 (11.0)                                      |         | Negative         | 241 (36.1)                                 | 9,648 (23.8)                                      |         |
| T1                             | 179 (26.8)                                 | 18,078 (44.6)                                     |         | Unknown          | 69 (10.3)                                  | 5,022 (12.4)                                      |         |
| T2                             | 327 (49.0)                                 | 14,832 (36.6)                                     |         | HER2 status      |                                            |                                                   | <0.001  |
| T3                             | 104 (15.6)                                 | 2,324 (5.7)                                       |         | Positive         | 129 (19.3)                                 | 6,128 (15.1)                                      |         |
| T4                             | 36 (5.4)                                   | 520 (1.3)                                         |         | Negative         | 331 (49.6)                                 | 21,599 (53.3)                                     |         |
| Unknown                        | 4 (0.6)                                    | 305 (0.7)                                         |         | Unknown          | 208 (21.2)                                 | 12,801 (31.6)                                     |         |
| N stage                        |                                            |                                                   | <0.001  | Chemotherapy     |                                            |                                                   | <0.001  |
| N0                             | 339 (50.7)                                 | 25,230 (62.3)                                     |         | Yes              | 530 (79.3)                                 | 24,750 (61.1)                                     |         |
| N1                             | 183 (27.4)                                 | 10,106 (24.9)                                     |         | No               | 64 (9.6)                                   | 9,058 (22.3)                                      |         |
| N2                             | 77 (11.5)                                  | 3,193 (7.9)                                       |         | Unknown          | 74 (11.1)                                  | 6,720 (16.6)                                      |         |
| N3                             | 64 (9.6)                                   | 413 (1.0)                                         |         | Radiotherapy     |                                            |                                                   | <0.001  |
| Unknown                        | 5 (0.7)                                    | 4 (0.0)                                           |         | Yes              |                                            |                                                   |         |
| Stage                          |                                            |                                                   | <0.001  | Post-BCS         | 247 (37.0)                                 | 16,479 (40.7)                                     |         |
| 0                              | 18 (2.7)                                   | 4,314 (10.6)                                      |         | PMRT             | 115 (17.2)                                 | 4,196 (10.4)                                      |         |
| I                              | 144 (21.6)                                 | 13,275 (32.8)                                     |         | Palliative       | 1 (0.1)                                    | 119 (0.3)                                         |         |
| II                             | 318 (47.6)                                 | 16,426 (40.5)                                     |         | No               | 198 (29.6)                                 | 11,470 (28.3)                                     |         |
| III                            | 167 (25.0)                                 | 5,404 (13.3)                                      |         | Unknown          | 107 (16.0)                                 | 8,264 (20.4)                                      |         |
| IV                             | 21 (3.1)                                   | 593 (1.5)                                         |         | Hormone therapy  |                                            |                                                   | <0.001  |
| Unknown                        | 0                                          | 516 (1.3)                                         |         | Yes              | 306 (45.8)                                 | 21,409 (52.8)                                     |         |
|                                |                                            |                                                   |         | No               | 231 (34.6)                                 | 9,804 (24.2)                                      |         |
|                                |                                            |                                                   |         | Unknown          | 131 (19.6)                                 | 9,315 (23.0)                                      |         |

PABC=pregnancy-associated breast cancer; BCS=breast-conserving surgery; HER2=human epidermal growth factor receptor 2; Post-BCS=post-breast conserving surgery radiotherapy; PMRT=post-mastectomy radiotherapy.

\*Mean±SD.
